# Supplementary material for: Few Sex Differences in Hospitalized Suicide Attempters Aged 70 and Above
Source: PubMed Central journal article supplement (PMC5800240; doi:10.3390/ijerph15010141), 2018-01-16
Supplement: ijerph-15-00141-s001.pdf [file ijerph-15-00141-s001.pdf]

## Supplementary material:

**Table 1.** Ordinal regression models estimating associations between number of symptoms in specified group and sex.

| Symptoms                         | Estimate | Standard Error (SE) | t-Value | p-Value | Odds Ratio (OR) |
|----------------------------------|----------|---------------------|---------|---------|-----------------|
| Depression (ranked: 0–6)         |          |                     |         |         |                 |
| Sex Women ( Baseline group: Men) | -0.218   | 0.371               | -0.589  | 0.556   | 0.804           |
| Anxiety (ranked: 0–4)            |          |                     |         |         |                 |
| Sex Women ( Baseline group: Men) | 0.608    | 0.363               | 1.672   | 0.095   | 1.836           |
| Cognitive (ranked: 0–5)          |          |                     |         |         |                 |
| Sex Women ( Baseline group: Men) | -0.382   | 0.373               | -1.024  | 0.306   | 0.683           |
| Somatic (ranked: 0–2)            |          |                     |         |         |                 |
| Sex Women ( Baseline group: Men) | 0.165    | 0.437               | 0.377   | 0.706   | 1.179           |

**Table 2.** Self-reported reasons for attempting suicide<sup>a</sup> among female ( $n = 56$ ) and male ( $n = 47$ ) hospitalized suicide attempters aged 70 and above.

|                                         | Women <sup>b</sup> $n = 56$ |        | Men $n = 47$ |        | Test Results <sup>c</sup> |
|-----------------------------------------|-----------------------------|--------|--------------|--------|---------------------------|
|                                         | <i>n</i>                    | (%)    | <i>n</i>     | (%)    | <i>p</i> -Value           |
| Psychological problems                  | 12                          | (21.8) | 12           | (26.1) | 0.645                     |
| Social problems                         | 9                           | (16.4) | 4            | (8.7)  | 0.372                     |
| Lack of meaning                         | 4                           | (7.3)  | 4            | (8.7)  | 1.000                     |
| Perceived burden                        | 7                           | (12.7) | 6            | (13.0) | 1.000                     |
| Escape                                  | 14                          | (25.5) | 15           | (32.6) | 0.510                     |
| Somatic problem sand pain               | 8                           | (14.5) | 8            | (17.4) | 0.787                     |
| Functioning and autonomy                | 12                          | (21.8) | 12           | (26.1) | 0.645                     |
| No memory or understanding              | 8                           | (14.5) | 7            | (15.2) | 1.000                     |
| Wanted to die without a specific reason | 6                           | (10.9) | 7            | (15.2) | 0.563                     |

<sup>a</sup> Subjects could report several reasons; <sup>b</sup> Data missing for 2 women; <sup>c</sup> Fisher's exact test.
